# Supplementary material for: Exploring the Genetic Regulation of Asexual Sporulation in Zymoseptoria tritici
Source: Front Microbiol. 2018 Aug 14;9:1859. doi: 10.3389/fmicb.2018.01859 (PMC6102487; doi:10.3389/fmicb.2018.01859)
Supplement: Supplementary file 1 [file Table_1.XLSX]

## Sheet: Sheet1
	Primer Name	Sequence	Fragment Amplified
	FWD_Hyg	TCGACAGAAGATGATATTGAAGGAG	Hygromycin-trpC cassette
	RVS_Hyg	CTATTCCTTTGCCCTCGGACGAGTG	Hygromycin-trpC cassette
	ZTabaA KO plasmid
	Primer Name	Sequence	Fragment Amplified
	FWD_ZTabaA_flank1	GGTGGACTCCTCTTAAAGCTTGGCTGCAGGGAGACTGGCGGTACGGCCACACTGTTCGT	ZTabaA1.5kb left flank
	RVS_ZTabaA_flank1	AAATGCTCCTTCAATATCATCTTCTGTCGAGAAGGCGACCCGTGTACTCGAGGAGGCACG	ZTabaA1.5kb left flank
	FWD_ZTabaA_flank2	CCCAGCACTCGTCCGAGGGCAAAGGAATAGTTGTTGAGAGGTTCCGGGAGTGATTGGCTT	ZTabaA1.5kb right flank
	RVS_ZTabaA_flank2	CTAGGCCACCATGTTGGGCCCGGCGCGCCGGTATCACGTCTCAGGCCACCTGGAAGCTTC	ZTabaA1.5kb right flank
	ZtBrlA1 KO plasmid
	Primer Name	Sequence	Fragment Amplified
	FWD_ZtBrIA1_flank1	GGTGGACTCCTCTTAAAGCTTGGCTGCAGGTCGTTCATCGTCCTCGAACGGTGATGCTCC	ZtBrIA11.5kb left flank
	RVS_ZtBrIA1_flank1	AAATGCTCCTTCAATATCATCTTCTGTCGAGAATTCTGATGTGTTGGGTGGAAAGTTTGA	ZtBrIA11.5kb left flank
	FWD_ZtBrIA1_flank2	CCCAGCACTCGTCCGAGGGCAAAGGAATAGGAATTCCGGACCGGCTCCAGGTCAAGCATG	ZtBrIA11.5kb right flank
	RVS_ZtBrIA1_flank2	CTAGGCCACCATGTTGGGCCCGGCGCGCCGAGCGCGAGTACCTCAACTTCGTCCTCGTCA	ZtBrIA11.5kb right flank
	ZtBrlA2 KO plasmid
	Primer Name	Sequence	Fragment Amplified
	FWD_ZtBrIA2_flank1	GGTGGACTCCTCTTAAAGCTTGGCTGCAGGAGCGTGGTTGATGGGCTATCGGCGAACAAC	ZBrlA21.5kb left flank
	RVS_ZtBrIA2_flank1	AAATGCTCCTTCAATATCATCTTCTGTCGAGTGCGAGTGTTGGTGAGCGGGATACATGAT	ZtBrlA21.5kb left flank
	FWD_ZtBrIA2_flank2	CCCAGCACTCGTCCGAGGGCAAAGGAATAGGCAGTGAGCAGTGAGCACTGATTGATGATG	ZtBrlA21.5kb right flank
	RVS_ZtBrIA2_flank2	CTAGGCCACCATGTTGGGCCCGGCGCGCCGGAAGTCAGGGGTCCCTTATCCGGGATCCGT	ZtBrlA2 1.5kb right flank
	ZtFlbB KO plasmid
	Primer Name	Sequence	Fragment Amplified
	FWD_ZtFlbB_flank1	GGTGGACTCCTCTTAAAGCTTGGCTGCAGGAAGCAAAGAGGAAATGACACTCACAAGTCG	ZTflbB1.5kb left flank
	RVS_ZtFlbB_flank1	AAATGCTCCTTCAATATCATCTTCTGTCGATAGAGGTGATGTTGGAGTAGAAGAAGAGGA	ZTflbB1.5kb left flank
	FWD_ZtFlbB_flank2	CCCAGCACTCGTCCGAGGGCAAAGGAATAGGCGAGCGAGCGAGCATACACAGGACATGGG	ZTflbB1.5kb right flank
	RVS_ZtFlbB_flank2	CTAGGCCACCATGTTGGGCCCGGCGCGCCGCCAGTAGCATCAAGTTACTCCATACCTTGC	ZTflbB1.5kb right flank
	ZtFlbC KO plasmid
	Primer Name	Sequence	Fragment Amplified
	FWD_ZtFlbC_flank1	GGTGGACTCCTCTTAAAGCTTGGCTGCAGGTGAAAGAGCTACGATCTGGGCAAAGTGGAC	ZtFlbC1.5kb left flank
	RVS_ZtFlbC_flank1	AAATGCTCCTTCAATATCATCTTCTGTCGAAGGGCCTGTCGCTTTGATATGTGTTCTCCT	ZtFlbC1.5kb left flank
	FWD_ZtFlbC_flank2	CCCAGCACTCGTCCGAGGGCAAAGGAATAGTCTCTGCTCGACGAATTGCGCACCCTTGTA	ZtFlbC1.5kb right flank
	RVS_ZtFlbC_flank 2	CTAGGCCACCATGTTGGGCCCGGCGCGCCGTTCTGCTAGTCAGTTCGGGGATTTGATAGA	ZtFlbC1.5kb right flank
	ZtStuA KO plasmid
	Primer Name	Sequence	Fragment Amplified
	FWD_ZtStuA_flank1	GGTGGACTCCTCTTAAAGCTTGGCTGCAGGAGATCATCATCCCCAACAAGGTACGTTTTT	ZtStuA 1.5kb left flank
	RVS_ ZtStuA_flank1	AAATGCTCCTTCAATATCATCTTCTGTCGAGGTAGGCAAAGGCAATGATTGAGGCACCAT	ZtStuA 1.5kb left flank
	FWD_ ZtStuA_flank2	CCCAGCACTCGTCCGAGGGCAAAGGAATAGTTCTGGATCGCCCAAAAGTCCGACGGCGGC	ZtStuA 1.5kb right flank
	RVS_ ZtStuA_flank2	CTAGGCCACCATGTTGGGCCCGGCGCGCCGACACAAACTGAAAAATCTCACACTTTCCCT	ZtStuA 1.5kb right flank
	Supplementary Table 1: Primers used for knock-out plasmid synthesis
