# Supplementary material for: Exploring the Genetic Regulation of Asexual Sporulation in Zymoseptoria tritici
Source: Front Microbiol. 2018 Aug 14;9:1859. doi: 10.3389/fmicb.2018.01859 (PMC6102487; doi:10.3389/fmicb.2018.01859)
Supplement: Supplementary file 3 [file Table_3.xlsx]

## Sheet: Sheet1
	Primer Name	Sequence	Fragment amplified
	ZtAbaA_WT_FWD	AAGCGAAGTCAGCGCGGAGACACGGCAATA	ZtAbaA gene (wild-type)
	ZtAbaA_WT_RVS	GGTAATAGTGAGCTTCGTGATGTAGTGGCT	ZtAbaA gene (wild-type)
	ZtAbaA_KO_FWD	AAGCGAAGTCAGCGCGGAGACACGGCAATA	Hyg-trpC gene (KO mutant)
	ZtAbaA_KO_RVS	CCAAGCAGCAGATGATAATAATGTCCTCGT	Hyg-trpC gene (KO mutant)
	ZtBrlA1_WT_FWD	CGGTAGAACTAAATAGACGTAACTCGAGCT	ZtBrlA1 gene (wild-type)
	ZtBrlA1_WT_RVS	GGCTTTTCGCCGGTATGGCTGTAGGTGTGG	ZtBrlA1 gene (wild-type)
	ZtBrlA1_KO_FWD	CGGTAGAACTAAATAGACGTAACTCGAGCT	Hyg-trpC gene (KO mutant)
	ZtBrlA1_KO_RVS	CCAAGCAGCAGATGATAATAATGTCCTCGT	Hyg-trpC gene (KO mutant)
	ZtBrlA2_WT_FWD	ATATTCCTTGTTGCTGTTGGCATGTATGTT	ZtBrlA2 gene (wild-type)
	ZtBrlA2_WT_RVS	CTGGAAACGGAACGACAAGCATCGGACAAT	ZtBrlA2 gene (wild-type)
	ZtBrlA2_KO_FWD	ATATTCCTTGTTGCTGTTGGCATGTATGTT	Hyg-trpC gene (KO mutant)
	ZtBrlA2_KO_RVS	CCAAGCAGCAGATGATAATAATGTCCTCGT	Hyg-trpC gene (KO mutant)
	ZtFlbB_WT_FWD	TTGGGCGTGCTTTTCGCGGGTGTAACGGGT	ZtFlbB gene (wild-type)
	ZtFlbB_WT_RVS	ATGCAGGAGAGGTTGAGACTGAAAGGGAAA	ZtFlbB gene (wild-type)
	ZtFlbB_KO_FWD	TTGGGCGTGCTTTTCGCGGGTGTAACGGGT	Hyg-trpC gene (KO mutant)
	ZtFlbB_KO_RVS	CCAAGCAGCAGATGATAATAATGTCCTCGT	Hyg-trpC gene (KO mutant)
	ZtFlbC_WT_FWD	TGAAAGAGCTACGATCTGGGCAAAGTGGAC	ZtFlbC gene (wild-type)
	ZtFlbC_WT_RVS	TGCGTCGTAGCCACCCATGCTGCTGAATTG	ZtFlbC gene (wild-type)
	ZtFlbC_KO_FWD	TGAAAGAGCTACGATCTGGGCAAAGTGGAC	Hyg-trpC gene (KO mutant)
	ZtFlbC_KO_RVS	CCAAGCAGCAGATGATAATAATGTCCTCGT	Hyg-trpC gene (KO mutant)
	ZtStuA_WT_FWD	GCGAGACACCCACGCACTTCGACAGCTACT	ZtStuA gene (wild-type)
	ZtStuA_WT_RVS	GTGCATCGGACCAATCTTGACCACATGGCG	ZtStuA gene (wild-type)
	ZtStuA_KO_FWD	GCGAGACACCCACGCACTTCGACAGCTACT	Hyg-trpC gene (KO mutant)
	ZtStuA_KO_RVS	CCAAGCAGCAGATGATAATAATGTCCTCGT	Hyg-trpC gene (KO mutant)
	Supplementary Table 3: Primers used to test the purity of Zymoseptoria tritici knock-out mutants.
